# Supplementary material for: Automated closed-loop management of body temperature using forced-air blankets: preliminary feasibility study in a porcine model
Source: Springer Nature journal article supplement (doi:10.1186/s12871-018-0542-4), 2018-07-03
Supplement: MOESM1 [file 15904160]

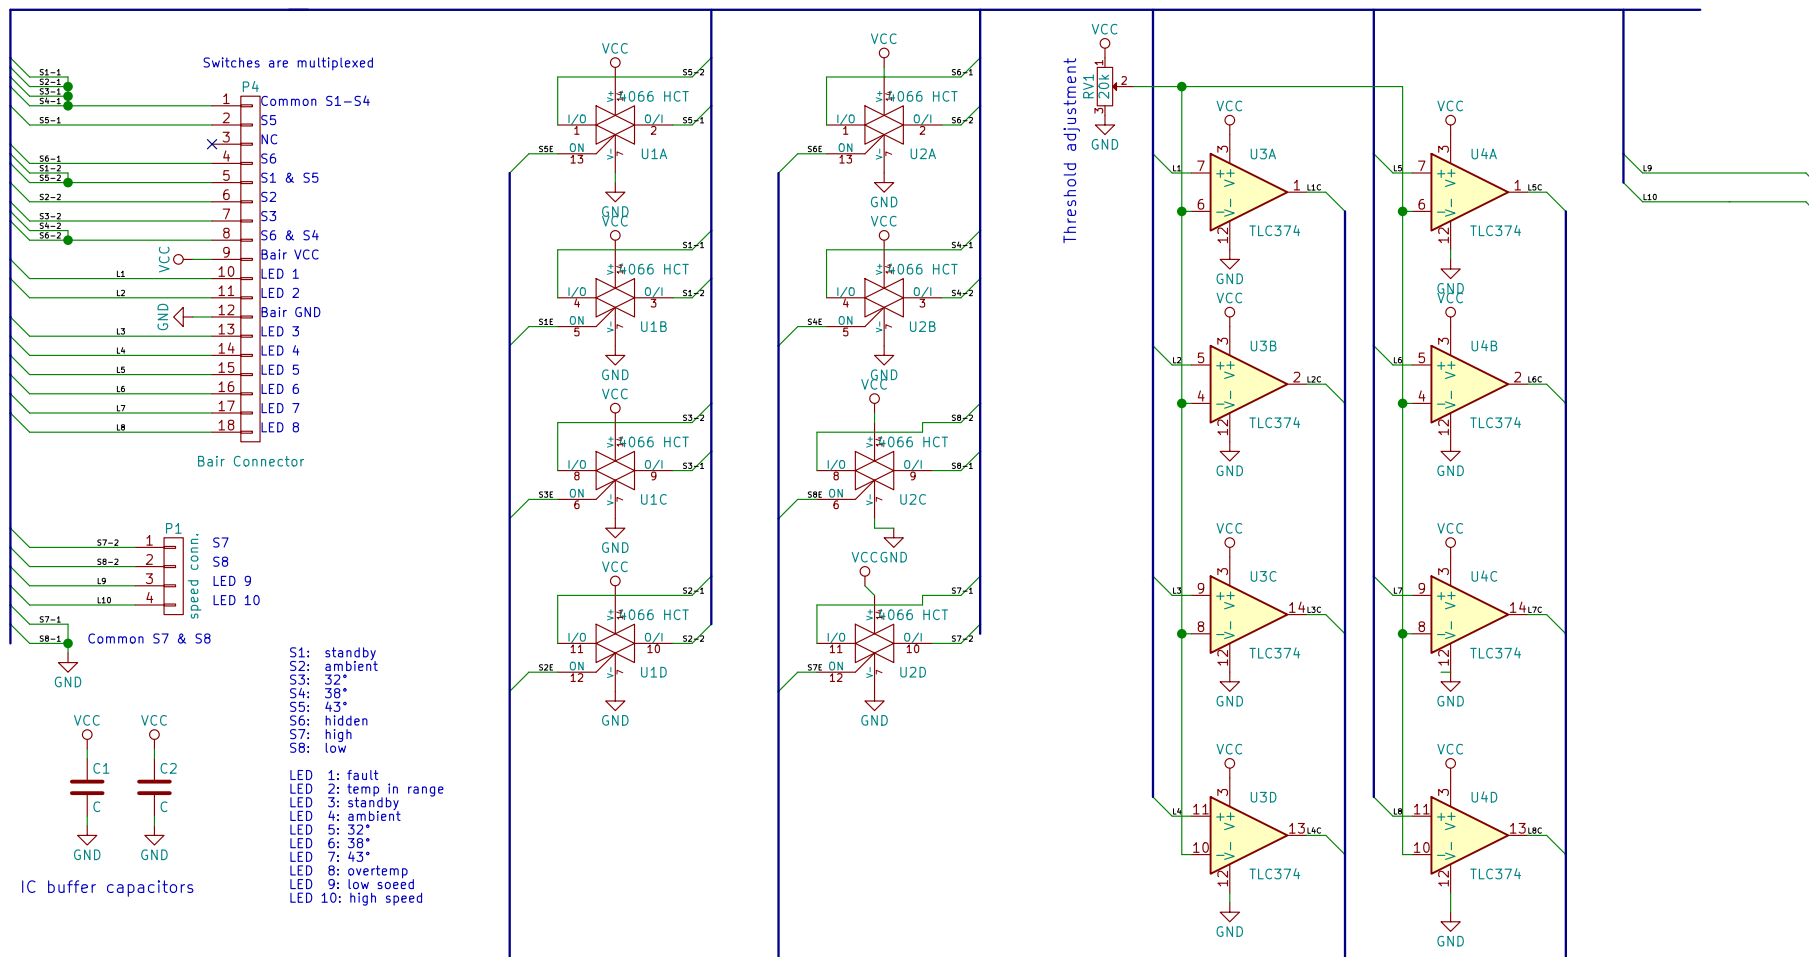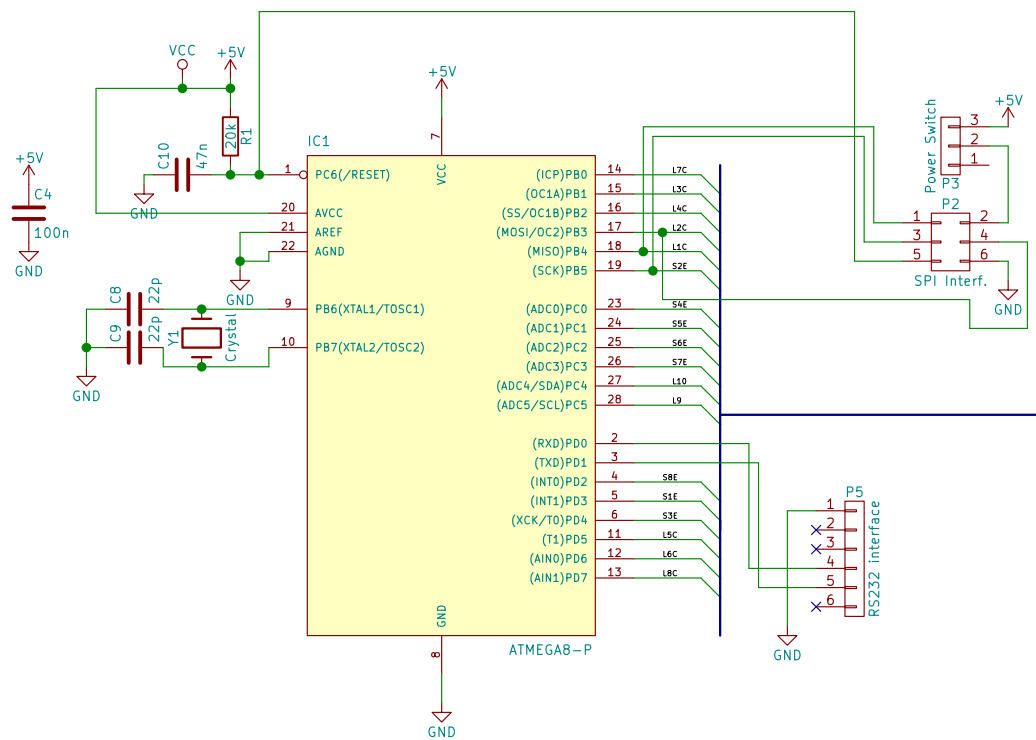

Compatible to 3M BairHugger 775 User Interface PCB Rev A  
**Jörg Peter**  
 Sheet: /  
 File: bairhugger-hack.sch  
**Title: Bairhugger RC piggyback**  
 Size: User Date: 2016-11-04  
 KiCad E.D.A. kicad 4.0.4-stable  
 Rev: 1  
 Id: 1/1
